# Supplementary material for: LY6G6D is a selectively expressed colorectal cancer antigen that can be used for targeting a therapeutic T-cell response by a T-cell engager
Source: Frontiers journal article supplement (doi:10.3389/fimmu.2022.1008764), 2022-09-08
Supplement: Presentation_1.pdf [file Presentation_1.pdf]

Supplemental Figure and Material and Methods

Supplemental Figure 1

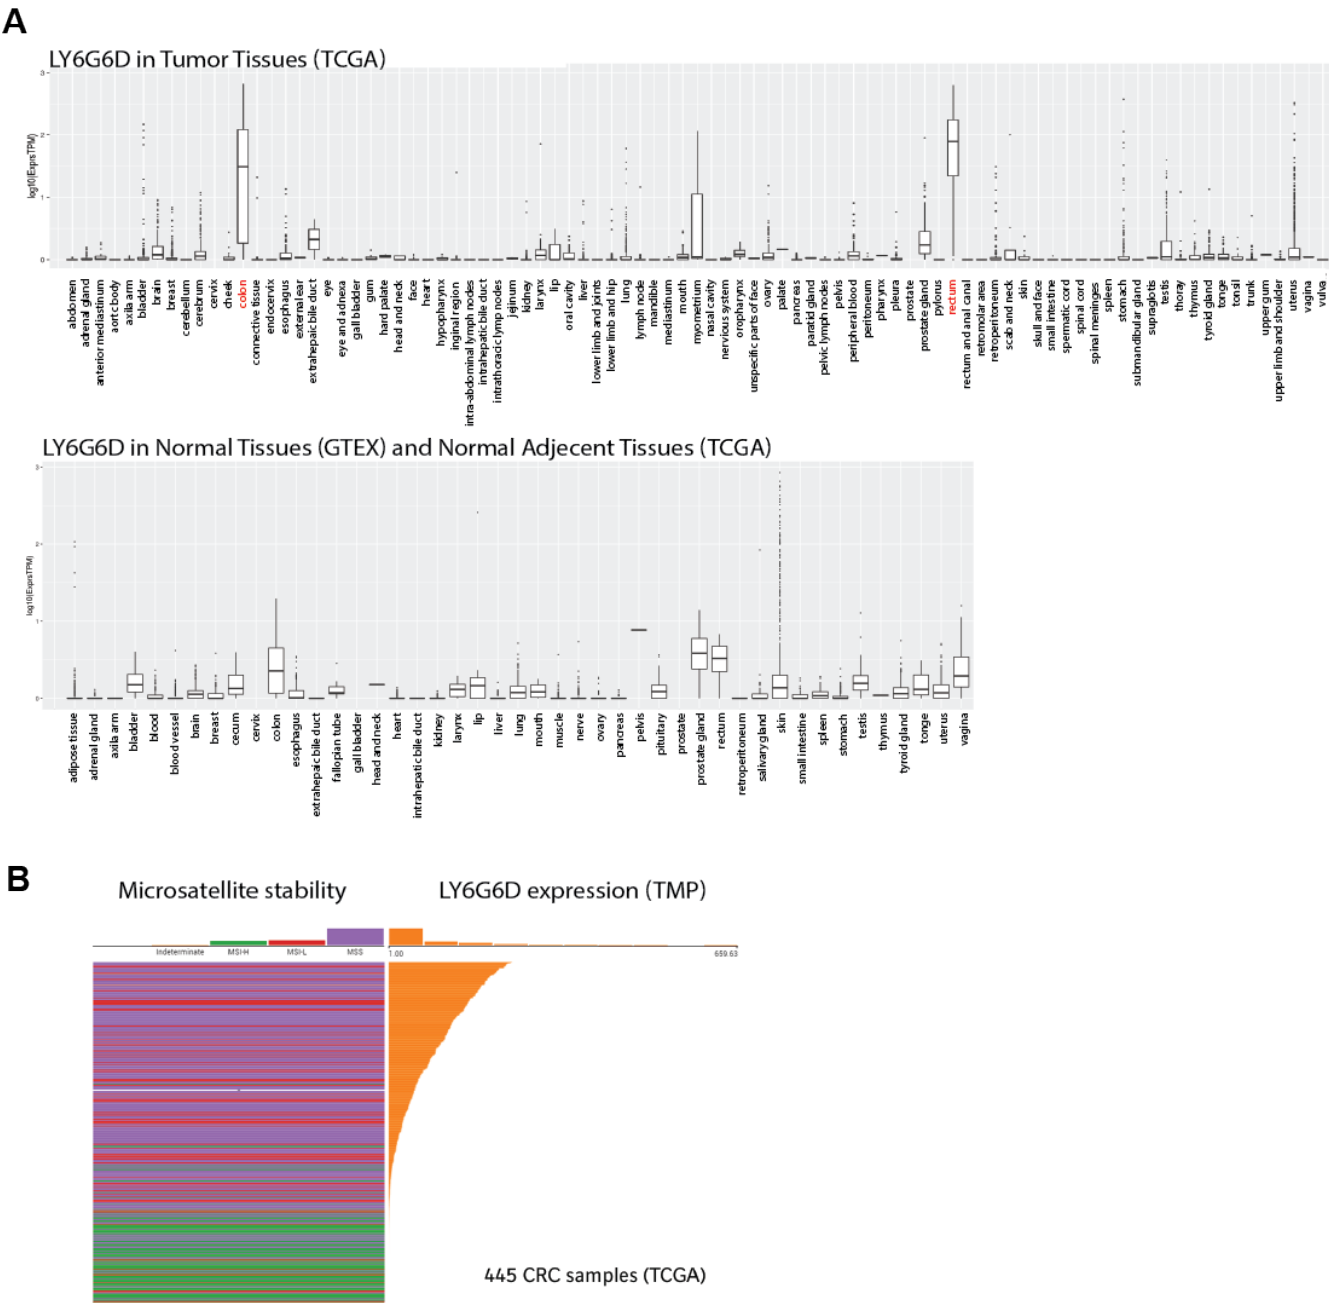

Supplemental Figure 1.

(A) LY6G6D mRNA expression in tumors (TCGA) and normal tissues (GTEx). (B) Correlation of LY6G6D mRNA expression and microsatellite instability status. MSI-H: microsatellite instability high (green); MSI-L: microsatellite instability low (red); MSS: microsatellite stable (purple).

## Supplemental Figure 2

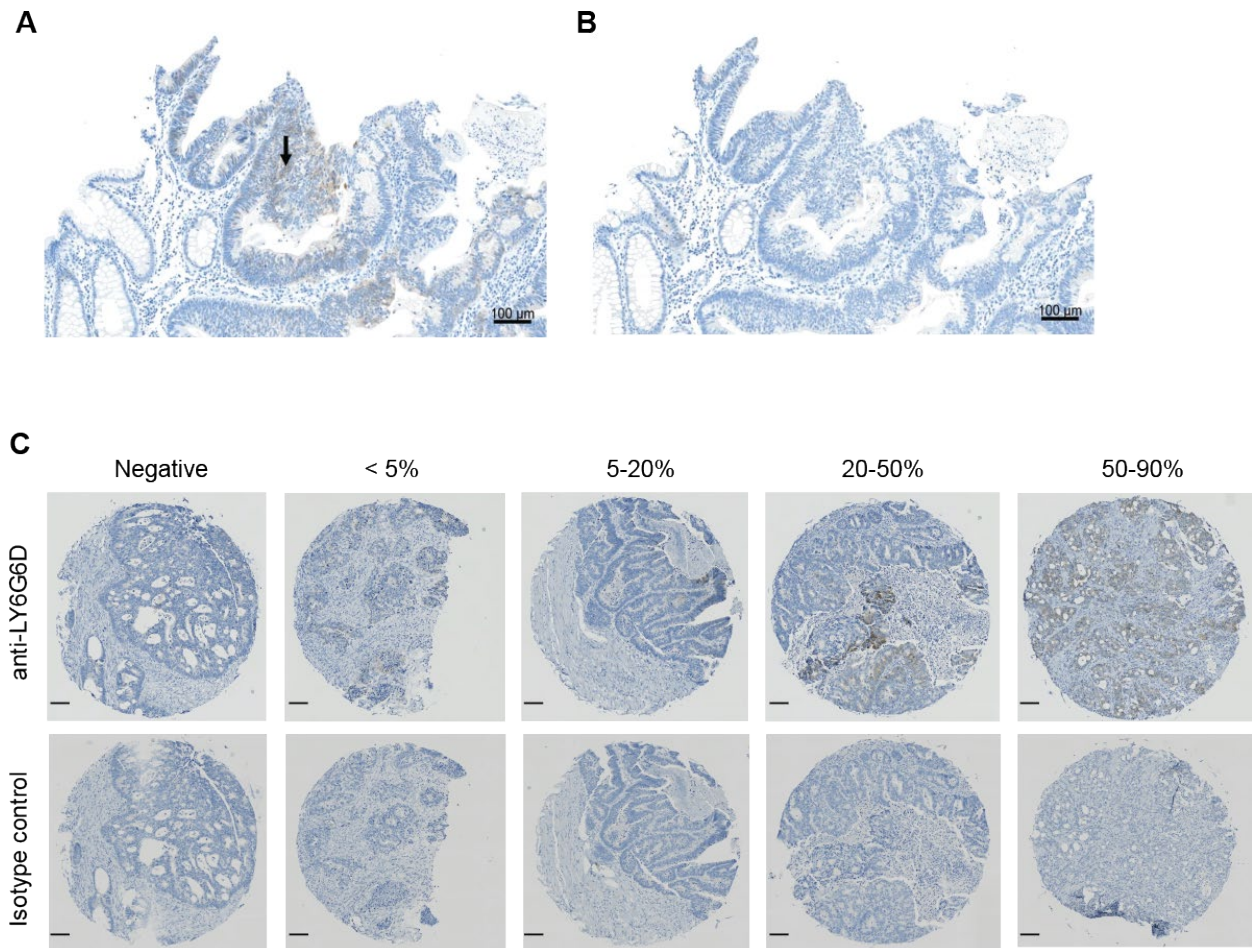

## Supplemental Figure 2.

(A-B) Antibody absorption test by LY6G6D recombinant protein pre-incubation using CRC tissue sample. Anti-LY6G6D staining of tumor cells was detected in CRC tissue without pre-incubation of clone 10C1 with recombinant protein (A). No staining was detected in CRC tissue after pre-incubation of clone 10C1 with 50X recombinant protein (B). (C) Representative images of CRC samples with different percentage of LY6G6D stained cells within the tumor area stained with clone clone 10C1 (top), or isotype control (bottom). Bar length is 100  $\mu$ m.

Supplemental Figure 3

**A**

LY6G6D<sup>+</sup> cell lines

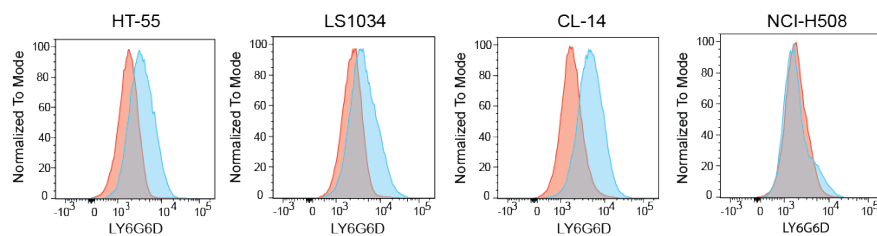

LY6G6D<sup>-</sup> cell lines

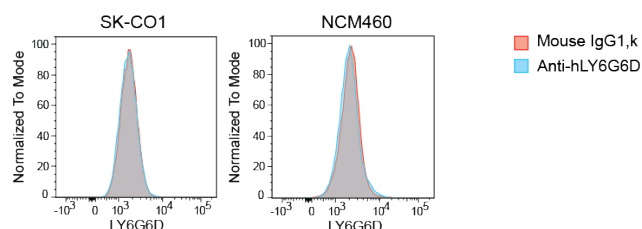

**B**

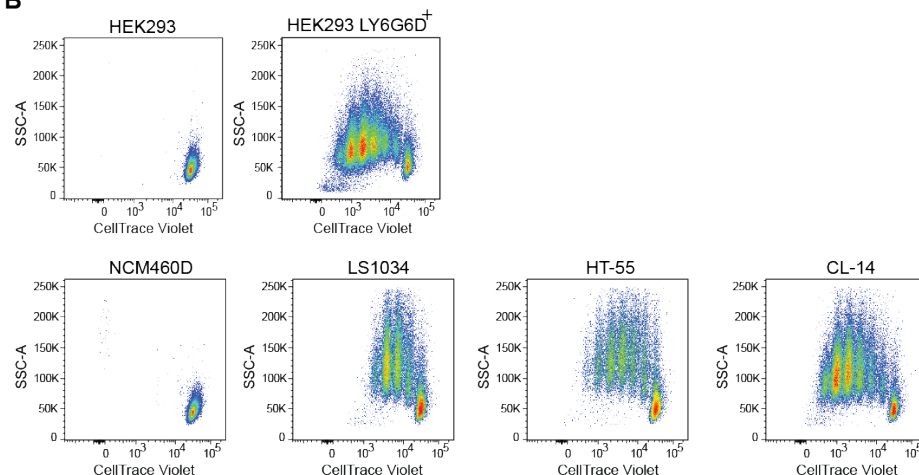

**C**

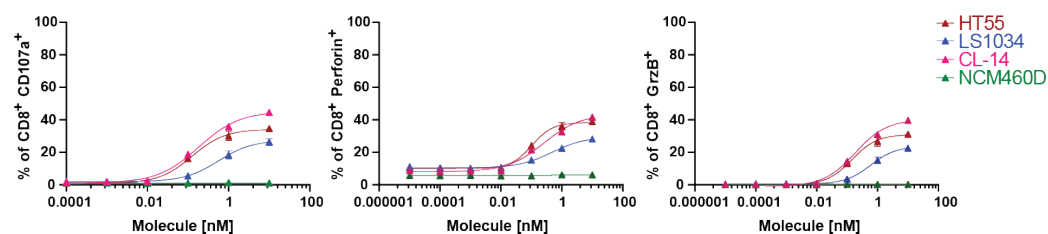

Supplemental Figure 3.

(A) LY6G6D expression on CRC cell lines. (B) LY6G6D-negative (HEK293 and NCM460) and positive (HEK LY6G6D<sup>+</sup>, LS1034, HT-55 and CL-14) were co-incubated with purified labelled T cells and LY6G6D/CD3 TcE for 5 days. Proliferation of T cells was assessed by dilution of cell tracer. (C) LY6G6D-negative and -positive tumor cells were co-incubated with purified T cells and increasing amounts of concentrations of LY6G6D/CD3 TcE. Degranulation markers were analyzed by FACs after 72 hours of incubation.

Supplemental Figure 4

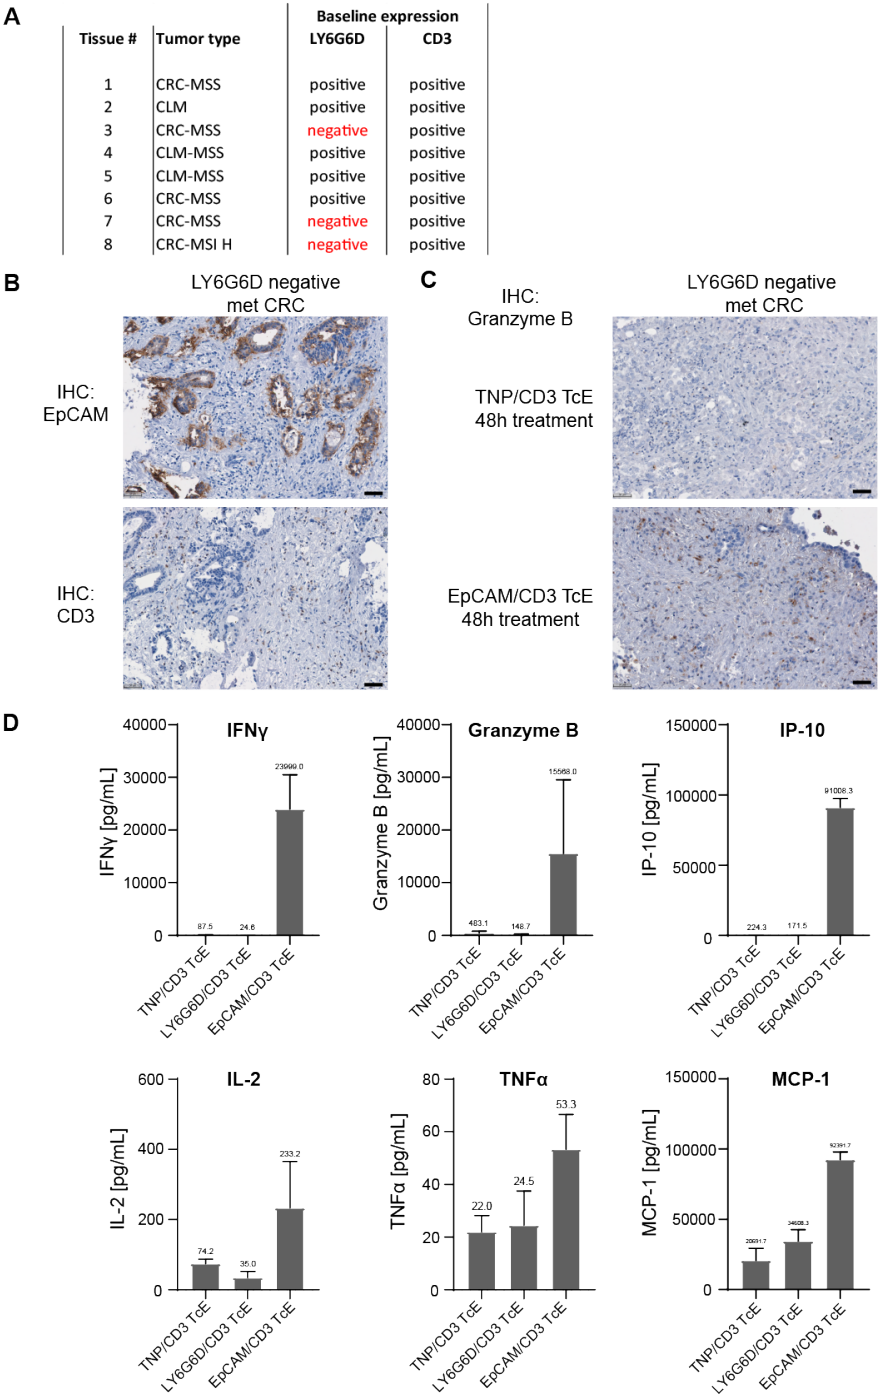

Supplemental Figure 4.

(A) Information on CRC phenotype and baseline expression of LY6G6D and CD3 in CRC tissue samples. (B) EpCAM and CD3 expression in one LY6G6D- CRC tissue sample (tissue #3) at baseline. (C-D) Tissue #3 was cultured for with 1 nM LY6G6D/CD3 TcE, 1nM EpCAM/CD3 TcE or control TNP/CD3 TcE. After 48 hours, Granzyme B staining in the tissue slides (C) and cytokines in the supernatant (D) were assessed.

## Supplemental Figure 5

**A**

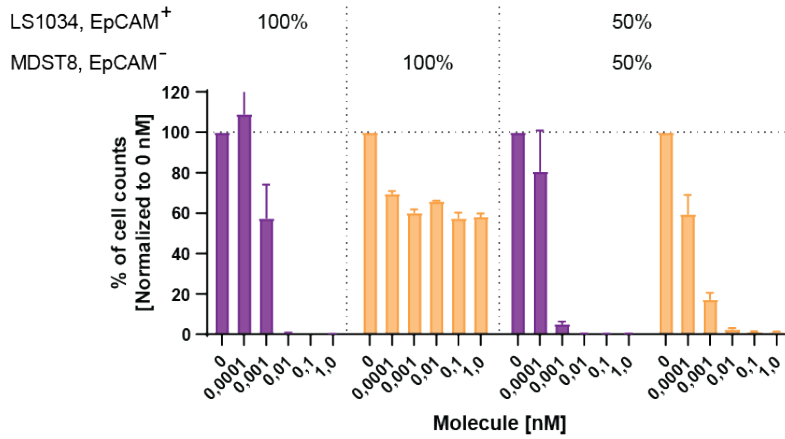

**B**

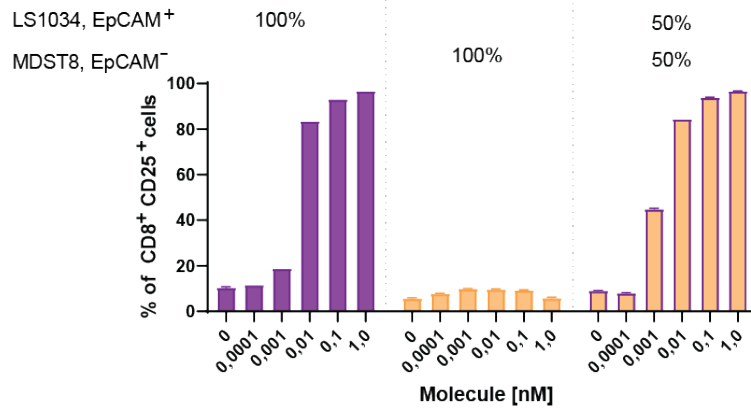

Supplemental Figure 5.

(A-B) EpCAM-positive and -negative (LS1034 and MDST8, respectively) tumor cells were labeled with cell tracer, plated isolated (100%) or co-cultured at 1:1 ratio. Tumor cells were then co-incubated with purified T cells and increasing amounts of concentrations of EpCAM/CD3 TcE. The total number of tumor cells (A) and T cell activation (B) was analyzed after 72 hours of incubation.

## Supplemental Figure 6

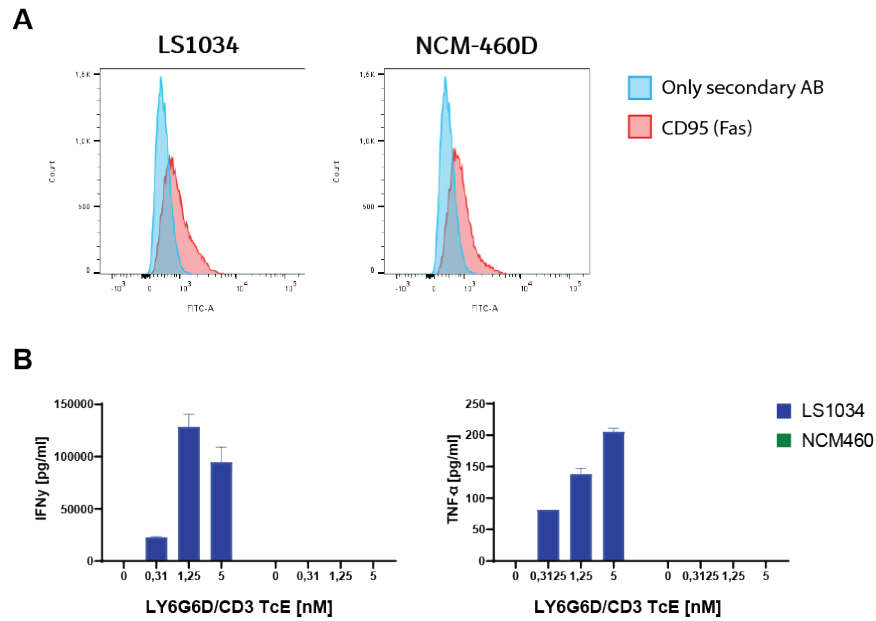

Supplemental Figure 6.

(A) Basal expression of Fas (CD95) in LS1034 and NCM-460D cell lines. (B) LY6G6D-positive (LS1034) or negative (NCM460) tumor cells were co-incubated with purified T cells and increasing amounts of concentrations of LY6G6D/CD3 TcE. IFN $\gamma$  and TNF $\alpha$  cytokines in the media were assessed after 72 hours of incubation

### **T cell Proliferation assay:**

Target cells were seeded in 96-well plates and pre-incubated at 37°C for 3 hours. Purified T-cells from PBMC (EasySep™ Human T Cell Enrichment Kit; Stemcell Technologies), labelled with CellTrace™ Violet Dye according to manufacturer's instructions. And added in a target to T cell ratio 1:10, along with the LY6G6D/CD3 TcE. After 5 days of incubation T-cells were harvested and stained with Zombie NIR Fixable Viability Dye. T-cells were stained with anti-CD4 and antiCD8 (BioLegend; BD Biosciences) and acquired on FACS Canto-II (BD Biosciences). Analysis of proliferation was performed by FlowJo (TreeStar).

### **Table of reagents:**

| Reagent or Resource                                     | Source                       | Identifier (Catalog #) |
|---------------------------------------------------------|------------------------------|------------------------|
| <b>Antibodies</b>                                       |                              |                        |
| Mouse anti-human CD45 (clone 2D1)                       | BioLegend                    | 368509                 |
| Mouse anti-human CD8 (clone RPA-T8)                     | BD Biosciences               | 562428                 |
| Mouse anti-human CD4 (clone OKT4)                       | BioLegend                    | 317444; 317414         |
| Mouse anti-human CD25 (clone M-A251)                    | BioLegend                    | 356110                 |
| Anti-human CD25 (clone BC96)                            | BioLegend                    | 302606                 |
| Mouse anti-human CD69 (clone FN50)                      | BD Biosciences               | 557745                 |
| Human TruStain FcX                                      | BioLegend                    | 422302                 |
| Anti-human LAG3 (clone T47-530)                         | BD Biosciences               | 745640                 |
| Anti-human CTLA4 (clone BNI3)                           | BioLegend                    | 369604                 |
| Anti-human TIM3 (clone 344823)                          | BD Biosciences               | 747961                 |
| Anti-human PD-1 (clone EH12.2H)                         | BioLegend                    | 329952                 |
| Anti-human FoxP3 (clone PCH101)                         | eBioscience/<br>ThermoFisher | 17-5773-82             |
| Anti-human Granzyme B (clone 351927)                    | Invitrogen                   | MA523639               |
| Anti-human CD107a (clone H4A3)                          | BioLegend                    | 328641                 |
| Anti-human Perforin (clone B-D48)                       | BioLegend                    | 353312                 |
| Mouse anti-human LY6G6D (clone 13.8)                    | BioLegend                    | 367004                 |
| Mouse IgG1kappa (clone MOPC-21)                         | BioLegend                    | 400114                 |
| Anti-LY6G6D                                             | BioLegend                    | 367003                 |
| Mouse IgG1 control antibody                             | Dako                         | X0931                  |
| <b>Critical Commercial Assays</b>                       |                              |                        |
| Zombie Green Fixable Viability Dye                      | BioLegend                    | 423112                 |
| Zombie NIR Fixable Viability Dye                        | BioLegend                    | 423106                 |
| CellTrace™ Violet Dye                                   | Invitrogen                   | C34557                 |
| CellTrace™ FarRed                                       | Invitrogen                   | C34564                 |
| CellTrace™ Oregon Green™ 488                            | ThermoFisher Scientific      | C34555                 |
| EasySep™ Human T Cell enrichment Kit negative selection | StemCell Technologies        | 19051                  |
| Steady-Glo® Luciferase Assay System                     | Promega                      | E2520                  |



|                                                             |                              |                                |
|-------------------------------------------------------------|------------------------------|--------------------------------|
| Foxp3 / Transcription Factor Staining Buffer Set            | eBioscience/<br>ThermoFisher | 00-5523-00                     |
| CellTiter 96® AQueous One Solution Cell Proliferation Assay | Promega                      | G3580                          |
| Cytotoxicity detection kit-Plus                             | Sigma/Roche                  | 04 744 934 001                 |
| Cell Line Nucleofector™ Kit V                               | Amaya/Lonza                  | VCA-1003                       |
| Phospholipase C Protein,<br>Phosphatidylinositol-Specific   | ThermoFisher                 | P6466                          |
| QIFIKIT®                                                    | Dako                         | K0078                          |
| CORNING TRANSWELL-96 SYSTEM,.4umPC MEMBRANE                 | Sigma-Aldrich                | CLS3391-5EA                    |
| AccuCheck COUNTING beads                                    | invitrogen                   | PCB100                         |
| DMEM-F12, HEPES                                             | Gibco                        | 31330038                       |
| Minimum Essential Medium Eagle                              | Sigma                        | M5650                          |
| RPMI 1640 Medium (ATCC modification)                        | Gibco                        | A1049101                       |
| Dulbecco's Modified Eagle's Medium – high glucose           | Sigma                        | D6429                          |
| M3:baseF™                                                   | Incell Inside™               | M300F                          |
| MEM Non-Essential Amino Acids Solution (100X)               | Gibco                        | 11140035                       |
| 2-Mercaptoethanol                                           | Gibco                        | 21985023                       |
| 200 mM L-Glutamine                                          | Gibco                        | 25030-024                      |
| Trypsin/EDTA                                                | Gibco                        | 043-903174                     |
| RPMI-1640 w/o Phenolred                                     | Gibco                        | 32404-014                      |
| Fetal Bovine Serum                                          | GE Healthcare                | SH30084.03<br>Lot#: DD17630267 |
| Hygromycin B                                                | ThermoFisher Scientific      | 10687010                       |
| Geneticin™ Selective Antibiotic                             | Gibco                        | 10131035                       |
| Incucyte® Caspase-3/7 Dye for Apoptosis                     | Sartorius                    | 4440                           |
| <b>Recombinant DNA</b>                                      |                              |                                |
| Plasmid:<br>LY6G6D_NFLAG_pcDNA 3.1(+)_A009                  | Life Technologies            | N/A                            |
| pGL4.30 NFATLuciferase reporter plasmid                     | Promega                      | E8481                          |
| <b>Software and Algorithms</b>                              |                              |                                |
| BD FACSDIVA v                                               | BD Biosciences               |                                |
| FlowJo V10                                                  | FlowJo, LLC                  |                                |
| GraphPadPrism 8.0/9.0                                       | GraphPad Software            |                                |
| Ensign Software                                             | Perkin Elmer                 |                                |
| SoftMax Pro (ELISA reader)                                  |                              |                                |



**Table 1. Cell lines:**

| Cell line        | Source                                                   | Culture method                     |
|------------------|----------------------------------------------------------|------------------------------------|
| CL-14            | Leibniz Institute DSMZ Cat#:<br>ACC 504                  | DMEM/F-12-20%                      |
| HT55             | Public Health England<br>cat.nr: 85061105<br>Lot: 09K002 | EMEM-20                            |
| NCI-H508         | ATCC                                                     | RPMI-10                            |
| LS1034           | ATCC-CRL-2158                                            | RPMI-10                            |
| NCM460           | IncCell<br>lot#C2010AUG10-01                             | M3-base medium-10%                 |
| HEK 293          | ATCC CRL-1573                                            | EMEM-10                            |
| Rec. 293 LY6G6D+ | Own description                                          | DMEM-10 + 1 mg/ml G418             |
| MDST8            | ECACC<br>Lot: WT13K0001                                  | DMEM-10                            |
| SK-CO1           | ATCC HTB-39<br>lot: 61834531                             | EMEM-10                            |
| Jurkat NFAT luc  | BI Canada, Laval                                         | RPMI-10 (0.25 mg/ml<br>Hygromycin) |
